# Supplementary material for: Edge-sharing bi-octahedral diruthenium(iv,iv) compounds containing Ru–Ru bonds chelated and bridged by two carbonate and two oxo groups
Source: Royal Society of Chemistry journal article supplement (doi:10.1039/d3dt03864e), 2024-01-01
Supplement: d3dt03864e1.pdf [file d3dt03864e1.pdf]

## Electronic Supporting Information (ESI)

# Edge-Sharing Bi-octahedral Diruthenium(IV,IV) Compounds Containing Ru-Ru Double Bonds Chelated and Bridged by Two Carbonate and Two Oxo Groups

Yu-Ru He, Mi Zhang, Wen-Hui Huang, Xiang-Xian Xue, Zi-Qin Zhou, Li-Na

Feng, Jian-Hui Yang and Bin Liu\*

*Key Laboratory of Synthetic and Natural Functional Molecule of the Ministry of Education, Xi'an Key Laboratory of Functional Supramolecular Structure and Materials, College of Chemistry & Materials Science, Northwest University, Xi'an 710127, P. R. China.*

**Table 1.** Crystallographic data and structure refinement details for compounds **1**–**3**.

| Compounds                                                                                  | <b>1</b>                                                                       | <b>2</b>                                                                       | <b>3</b>                                                                       |
|--------------------------------------------------------------------------------------------|--------------------------------------------------------------------------------|--------------------------------------------------------------------------------|--------------------------------------------------------------------------------|
| Empirical formula                                                                          | H <sub>32</sub> C <sub>10</sub> N <sub>4</sub> O <sub>16</sub> Ru <sub>2</sub> | H <sub>34</sub> C <sub>12</sub> N <sub>4</sub> O <sub>14</sub> Ru <sub>2</sub> | H <sub>52</sub> C <sub>14</sub> N <sub>4</sub> O <sub>22</sub> Ru <sub>2</sub> |
| <i>M<sub>r</sub></i>                                                                       | 666.53                                                                         | 660.57                                                                         | 830.73                                                                         |
| Crystal system                                                                             | Monoclinic                                                                     | Monoclinic                                                                     | Monoclinic                                                                     |
| Space group                                                                                | <i>P</i> 2 <sub>1</sub> / <i>n</i>                                             | <i>P</i> 2 <sub>1</sub> / <i>n</i>                                             | <i>P</i> 2 <sub>1</sub> / <i>c</i>                                             |
| <i>a</i> [Å]                                                                               | 7.2244(16)                                                                     | 7.1532(3)                                                                      | 7.8283(6)                                                                      |
| <i>b</i> [Å]                                                                               | 13.610(3)                                                                      | 13.3890(5)                                                                     | 14.3445(11)                                                                    |
| <i>c</i> [Å]                                                                               | 11.705(3)                                                                      | 11.9650(6)                                                                     | 14.3344(11)                                                                    |
| $\beta$ [°]                                                                                | 94.217(4)                                                                      | 90.039(2)                                                                      | 90.810(2)                                                                      |
| <i>V</i> [Å <sup>3</sup> ]                                                                 | 1147.8(4)                                                                      | 1145.94(9)                                                                     | 1609.5(2)                                                                      |
| <i>Z</i>                                                                                   | 2                                                                              | 2                                                                              | 2                                                                              |
| $\rho_{\text{calcd}}$ [g·cm <sup>-3</sup> ]                                                | 1.929                                                                          | 1.914                                                                          | 1.722                                                                          |
| $\mu$ [mm <sup>-1</sup> ]                                                                  | 1.396                                                                          | 1.391                                                                          | 5.674                                                                          |
| <i>F</i> (000)                                                                             | 672                                                                            | 668                                                                            | 864                                                                            |
| GOF on <i>F</i> <sup>2</sup>                                                               | 0.989                                                                          | 1.087                                                                          | 1.064                                                                          |
| Reflections                                                                                | 5689                                                                           | 7170                                                                           | 10852                                                                          |
| <i>R</i> <sub>(int)</sub>                                                                  | 0.050                                                                          | 0.0555                                                                         | 0.0234                                                                         |
| <i>R</i> <sub>1</sub> , <i>wR</i> <sub>2</sub> [ <i>I</i> > 2σ( <i>I</i> )] <sup>[a]</sup> | 0.0322, 0.0637                                                                 | 0.0449, 0.1111                                                                 | 0.0237, 0.0622                                                                 |
| <i>R</i> <sub>1</sub> , <i>wR</i> <sub>2</sub> (all data) <sup>[a]</sup>                   | 0.0521, 0.0712                                                                 | 0.0585, 0.1173                                                                 | 0.0244, 0.0626                                                                 |
| (Δρ) <sub>max</sub> , (Δρ) <sub>min</sub>                                                  | 0.413, -0.442                                                                  | 1.724, -1.468                                                                  | 0.546, -1.026                                                                  |

[a]  $R_1 = \sum |F_o| - |F_c| / \sum |F_o|$ ;  $wR_2 = [\sum w(F_o^2 - F_c^2)^2 / \sum w(F_o^2)^2]^{1/2}$

**Table 2.** Crystallographic data and structure refinement details for compounds 4–7.

| Compounds                                                                                  | 4                                                                              | 5                                                                              | 6                                                 | 7                                                |
|--------------------------------------------------------------------------------------------|--------------------------------------------------------------------------------|--------------------------------------------------------------------------------|---------------------------------------------------|--------------------------------------------------|
| Empirical formula                                                                          | H <sub>28</sub> C <sub>2</sub> O <sub>24</sub> Mg <sub>2</sub> Ru <sub>2</sub> | H <sub>24</sub> C <sub>2</sub> O <sub>22</sub> Ni <sub>2</sub> Ru <sub>2</sub> | H <sub>2</sub> Cl <sub>5</sub> OK <sub>2</sub> Ru | Cl <sub>10</sub> OK <sub>4</sub> Ru <sub>2</sub> |
| <i>M<sub>r</sub></i>                                                                       | 687.00                                                                         | 719.77                                                                         | 374.54                                            | 729.04                                           |
| Crystal system                                                                             | Monoclinic                                                                     | Monoclinic                                                                     | Orthorhombic                                      | Tetragonal                                       |
| Space group                                                                                | <i>P2<sub>1</sub>/c</i>                                                        | <i>P2<sub>1</sub>/c</i>                                                        | <i>Pnma</i>                                       | <i>I4/mmm</i>                                    |
| <i>a</i> [Å]                                                                               | 7.7401(10)                                                                     | 9.2137(9)                                                                      | 13.5704(17)                                       | 7.1221(11)                                       |
| <i>b</i> [Å]                                                                               | 9.3154(12)                                                                     | 5.9918(6)                                                                      | 9.6330(12)                                        | 7.1221(11)                                       |
| <i>c</i> [Å]                                                                               | 14.1849(18)                                                                    | 16.2072(15)                                                                    | 7.0067(9)                                         | 17.185(4)                                        |
| $\beta$ [°]                                                                                | 98.067(2)                                                                      | 96.8500(10)                                                                    | 90                                                | 90                                               |
| <i>V</i> [Å <sup>3</sup> ]                                                                 | 1012.6(2)                                                                      | 888.36(15)                                                                     | 915.9(2)                                          | 871.7(3)                                         |
| <i>Z</i>                                                                                   | 2                                                                              | 2                                                                              | 4                                                 | 2                                                |
| $\rho_{\text{calcd}}$ [g·cm <sup>-3</sup> ]                                                | 2.253                                                                          | 2.691                                                                          | 2.716                                             | 2.778                                            |
| $\mu$ [mm <sup>-1</sup> ]                                                                  | 1.665                                                                          | 3.866                                                                          | 4.002                                             | 4.197                                            |
| <i>F</i> (000)                                                                             | 688                                                                            | 712                                                                            | 708                                               | 684                                              |
| GOF on <i>F</i> <sup>2</sup>                                                               | 1.094                                                                          | 1.073                                                                          | 1.012                                             | 1.004                                            |
| Reflections collected                                                                      | 5431                                                                           | 4778                                                                           | 5036                                              | 2008                                             |
| <i>R</i> <sub>(int)</sub>                                                                  | 0.022                                                                          | 0.017                                                                          | 0.034                                             | 0.031                                            |
| <i>R</i> <sub>1</sub> , <i>wR</i> <sub>2</sub> [ <i>I</i> > 2σ( <i>I</i> )] <sup>[a]</sup> | 0.0187, 0.0497                                                                 | 0.0176, 0.0428                                                                 | 0.0323,                                           | 0.0384,                                          |
| <i>R</i> <sub>1</sub> , <i>wR</i> <sub>2</sub> (all data) <sup>[a]</sup>                   | 0.0213, 0.0511                                                                 | 0.0200, 0.0436                                                                 | 0.0417,                                           | 0.0422,                                          |
| ( $\Delta\rho$ ) <sub>max</sub> , ( $\Delta\rho$ ) <sub>min</sub> [e/Å <sup>3</sup> ]      | 0.513, -0.400                                                                  | 0.387, -0.397                                                                  | 1.457, -0.691                                     | 3.193, -                                         |

[a]  $R_1 = \sum ||F_o| - |F_c|| / \sum |F_o|$ ;  $wR_2 = [\sum w(F_o^2 - F_c^2)^2 / \sum w(F_o^2)^2]^{1/2}$

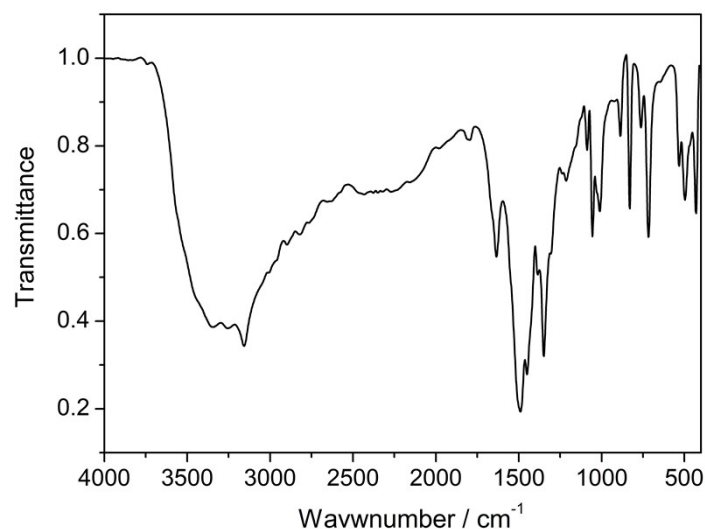**Fig. S1** IR spectrum of compound 1.

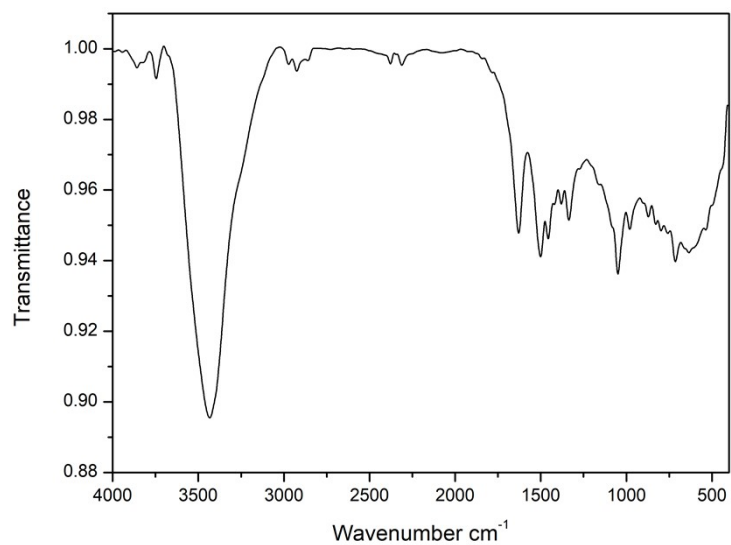

**Fig S2.** IR spectrum of compound **2**.

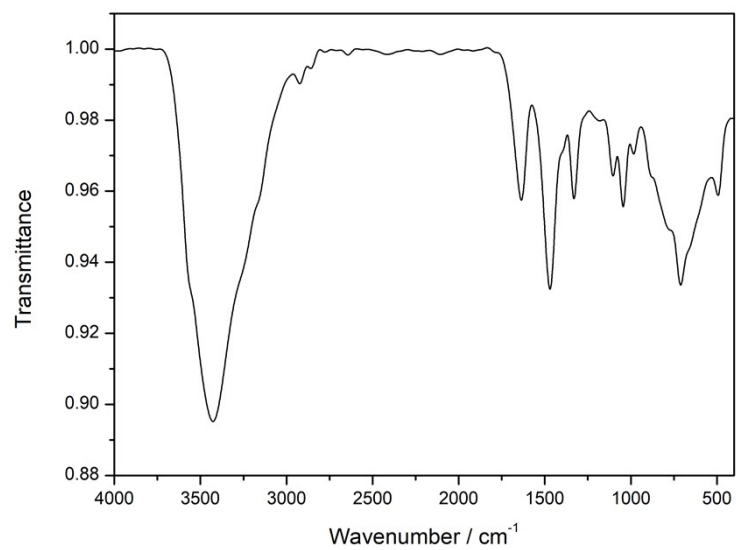

**Fig S3.** IR spectrum of compound **3**.

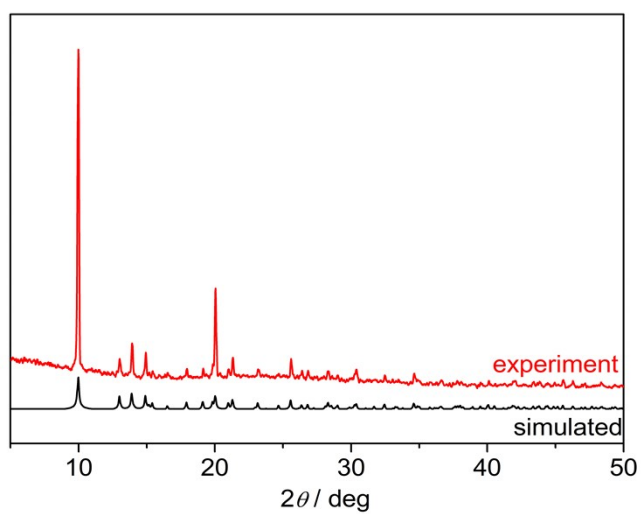

**Fig. S4** Comparison of XRPD patterns of the simulated pattern from the single-crystal structure determination and as-synthesized product of **1**.

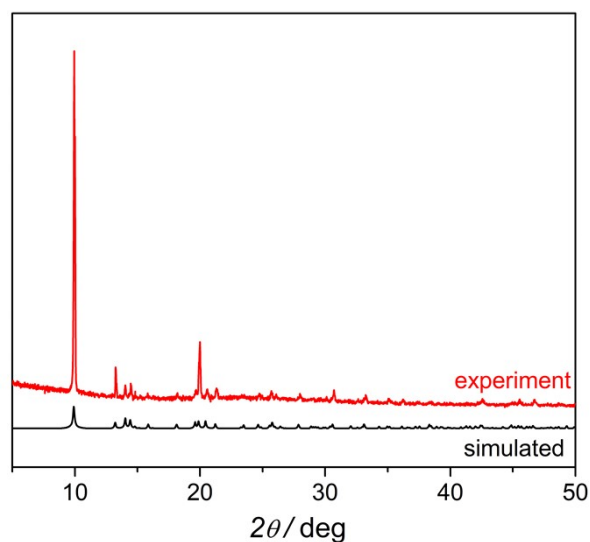

**Fig. S5** Comparison of XRPD patterns of the simulated pattern from the single-crystal structure determination and as-synthesized product of **2**.

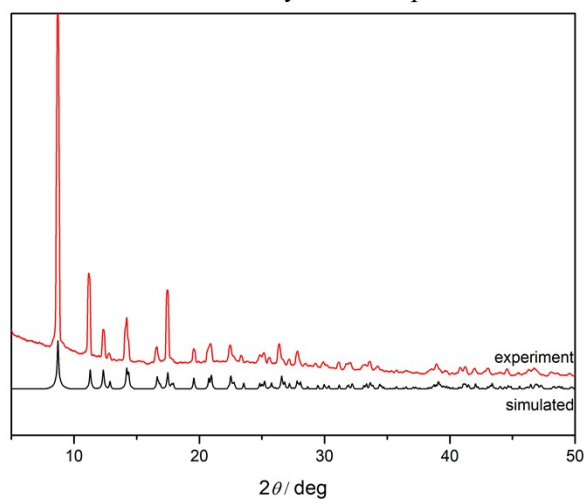

**Fig. S6** Comparison of XRPD patterns of the simulated pattern from the single-crystal structure determination and as-synthesized product of **3**.

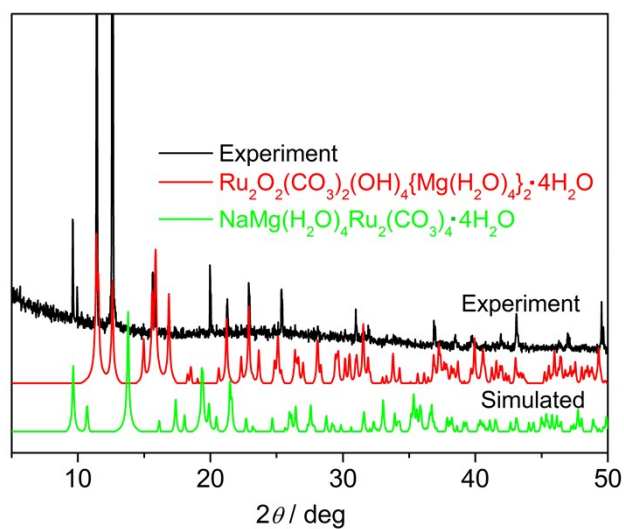

**Fig. S7** Comparison of XRPD patterns of the simulated pattern from the single-crystal structure determination and as-synthesized product of **3**.

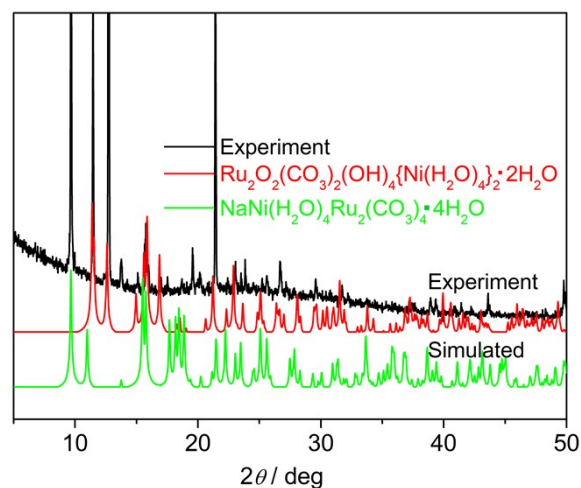

**Fig. S8** Comparison of XRPD patterns of the simulated pattern from the single-crystal structure determination and as-synthesized product of **3**.

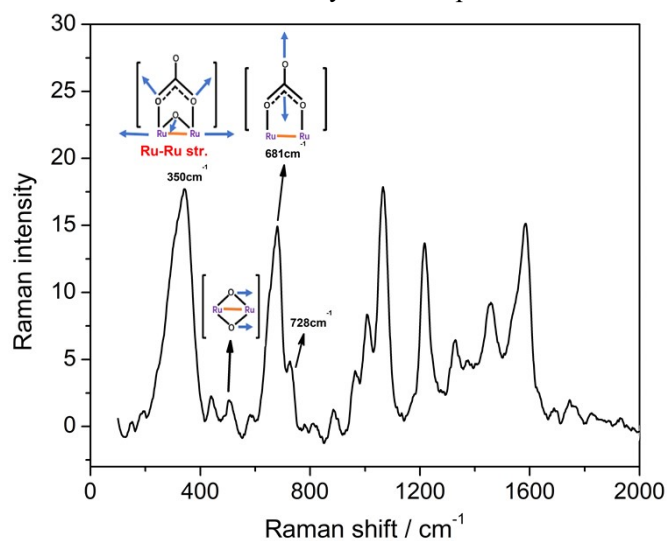

**Fig. S9** Comparison of XRPD patterns of the simulated pattern from the single-crystal structure determination and as-synthesized product of **1**.

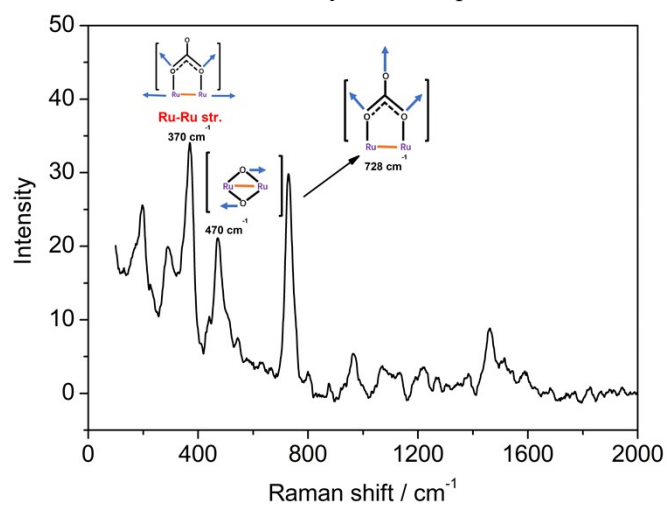

**Fig. S10** Comparison of XRPD patterns of the simulated pattern from the single-crystal structure determination and as-synthesized product of **2**.

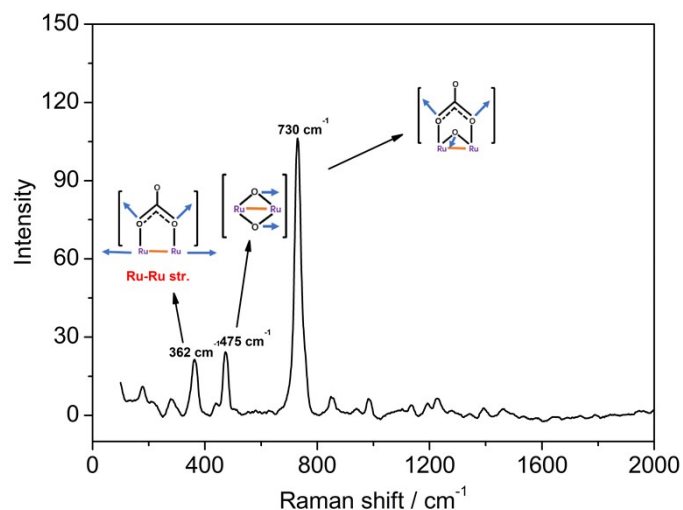

**Fig. S11** Comparison of XRPD patterns of the simulated pattern from the single-crystal structure determination and as-synthesized product of **3**.

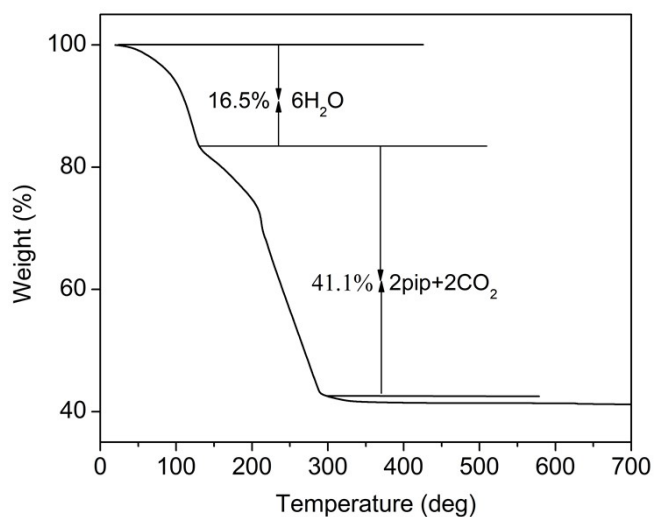

**Fig. S12** TG curves of compounds **1**.

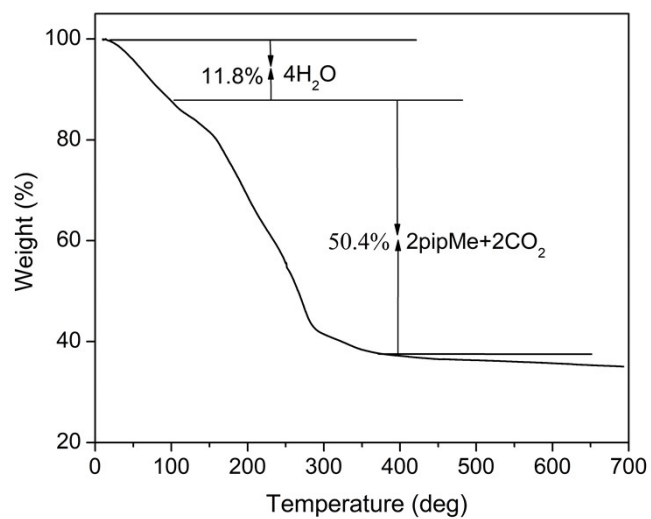

**Fig. S13** TG curves of compounds **2**.

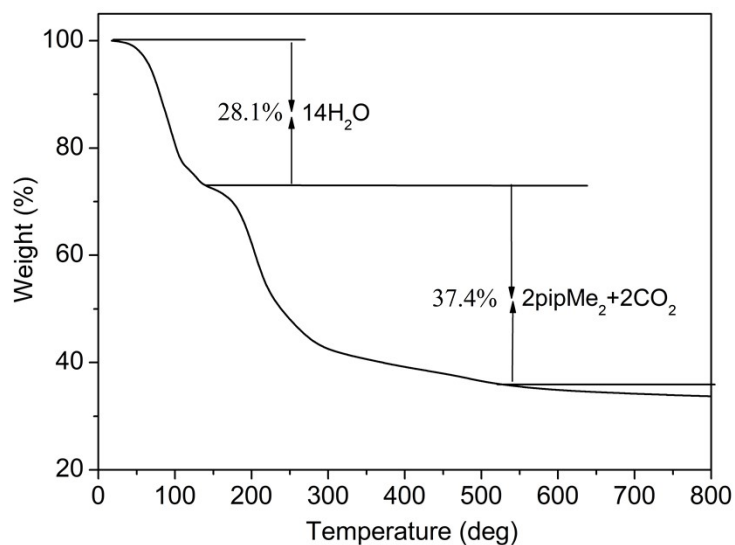

**Fig. S14** TG curves of compounds **3**.

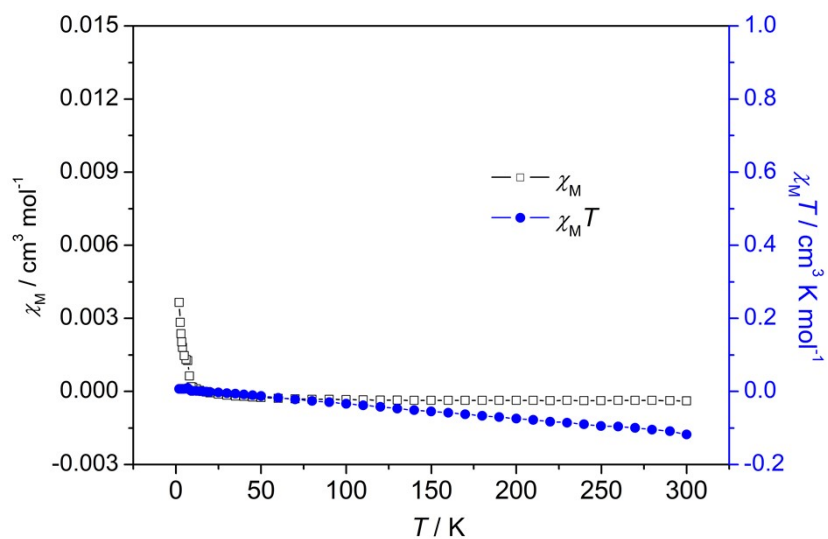

**Fig. S15**  $\chi_M$  and  $\chi_M T$  vs.  $T$  plots of compound **1**.

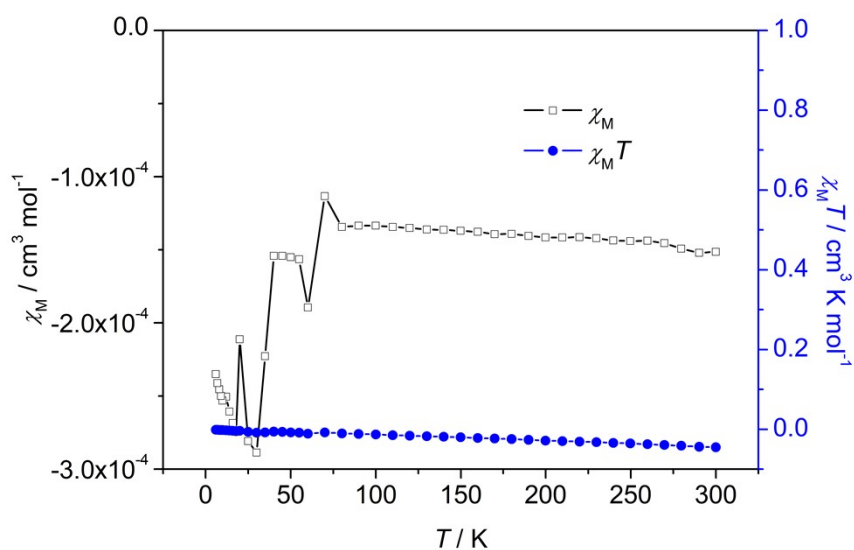

**Fig. S16**  $\chi_M$  and  $\chi_M T$  vs.  $T$  plots of compound **2**.

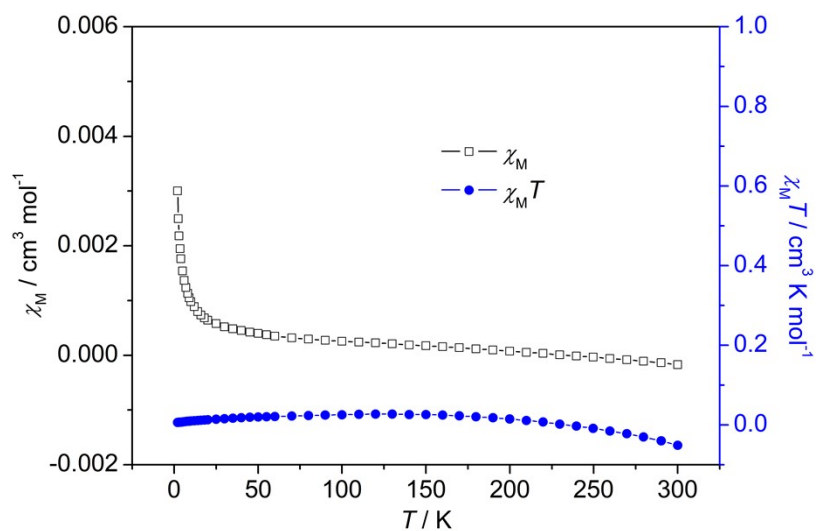

**Fig. S17**  $\chi_M$  and  $\chi_M T$  vs.  $T$  plots of compound **3**.

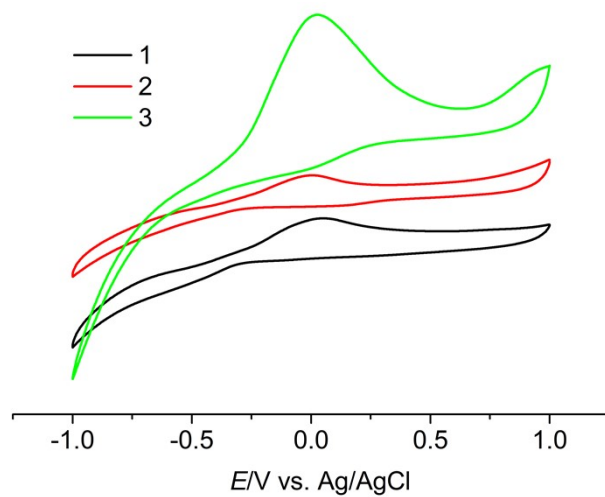

**Fig. S18** Cyclic voltammograms of **1-3** recorded in 1.0 M KCl aqueous solution.

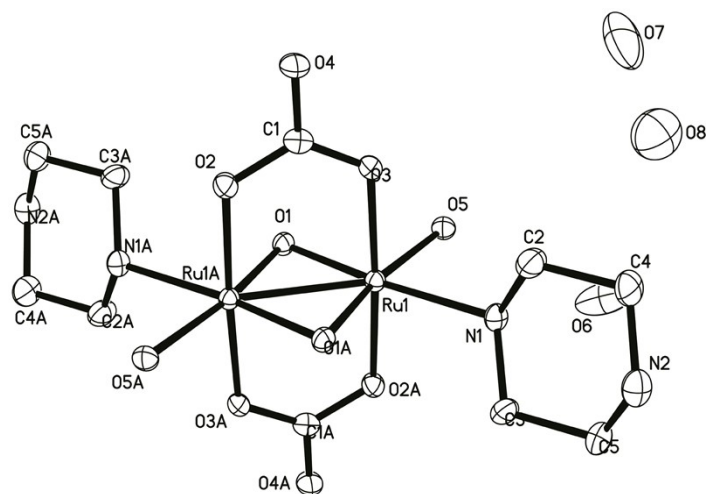

**Fig. S19** ORTEP representation of the crystal structure of **1**



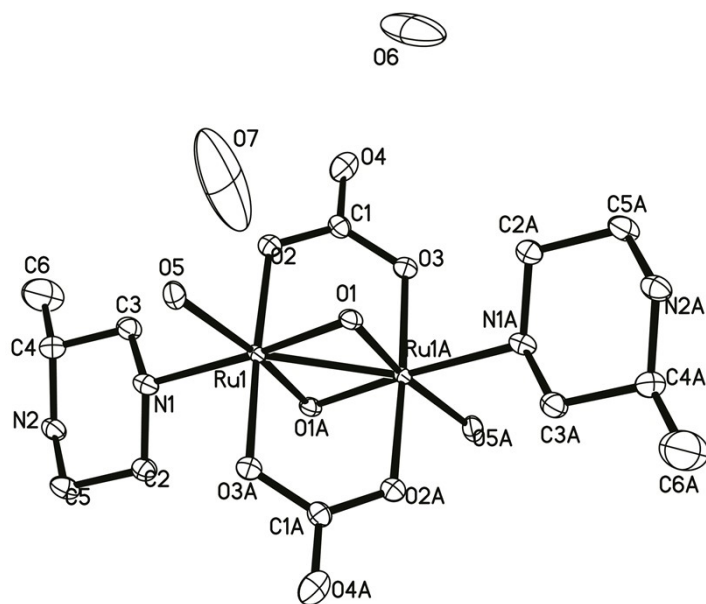

**Fig. S20** ORTEP representation of the crystal structure of **2**

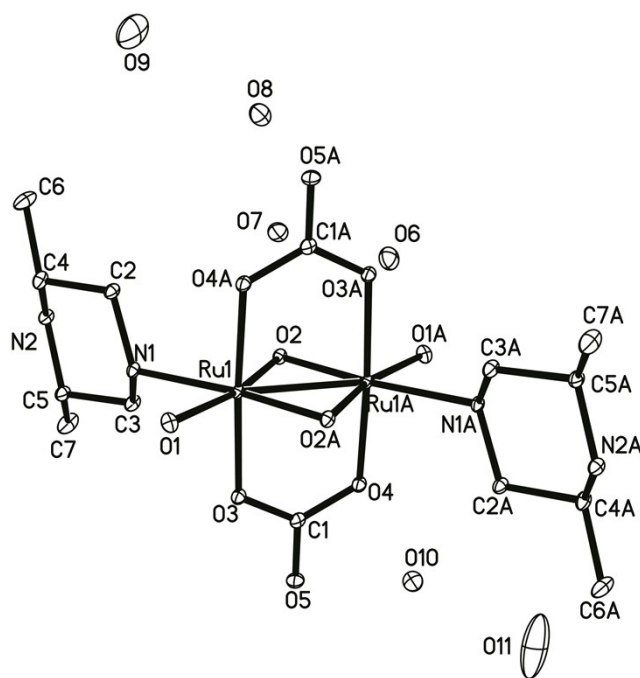

**Fig. S21** ORTEP representation of the crystal structure of **3**

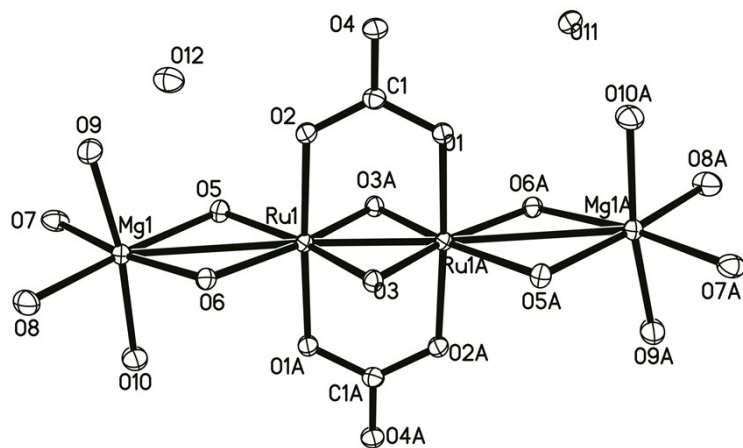

Fig. S22 ORTEP representation of the crystal structure of **4**

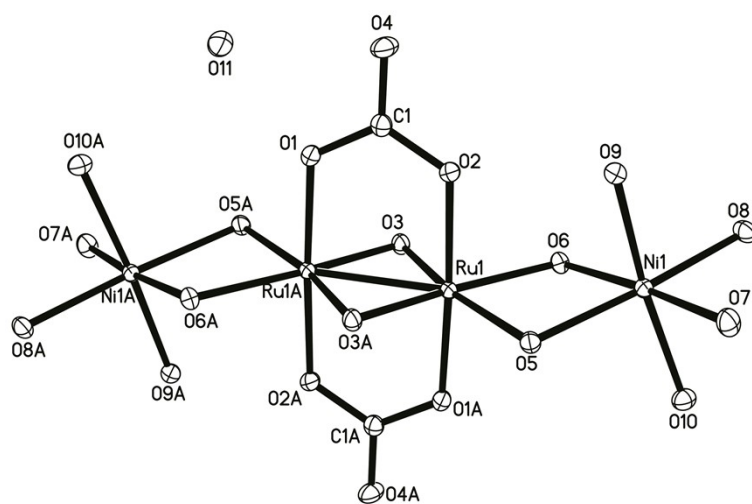

Fig. S23 ORTEP representation of the crystal structure of **5**

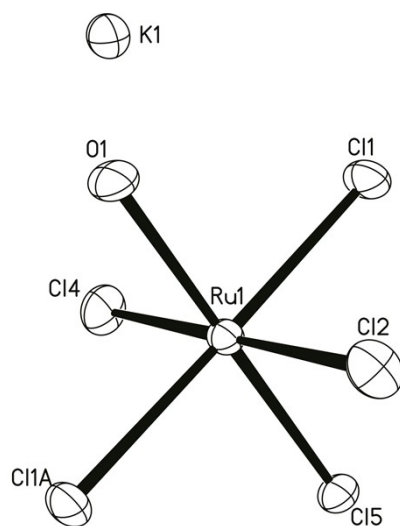

Fig. S24 ORTEP representation of the crystal structure of **6**

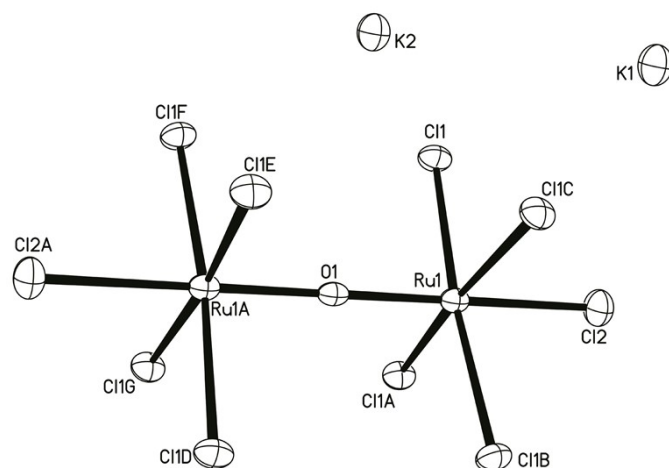

**Fig. S25** ORTEP representation of the crystal structure of **7**

**Table S3.** Selected bond distances (Å) and angles (°) for compound **1**

| Selected bond distances (Å) |            |                    |           |
|-----------------------------|------------|--------------------|-----------|
| Ru(1)-Ru(1A)                | 2.3849(8)  | O(3)-C(1)          | 1.282(6)  |
| Ru(1)-O(1)                  | 1.929(3)   | O(4)-C(1)          | 1.260(6)  |
| Ru(1)-O(3)                  | 2.050(3)   | N(1)-C(2)          | 1.470(6)  |
| Ru(1)-O(5)                  | 1.996(3)   | N(1)-C(3)          | 1.485(6)  |
| Ru(1)-N(1)                  | 2.145(4)   | N(2)-C(4)          | 1.481(7)  |
| Ru(1)-O(1A)                 | 1.881(3)   | N(2)-C(5)          | 1.476(7)  |
| Ru(1)-O(2A)                 | 2.037(3)   | C(2)-C(4)          | 1.521(7)  |
| O(2)-C(1)                   | 1.309(5)   | C(3)-C(5)          | 1.512(7)  |
| Selected angles (°)         |            |                    |           |
| O(1)-Ru(1)-O(3)             | 87.95(12)  | Ru(1A)-Ru(1)-O(1A) | 52.15(9)  |
| O(1)-Ru(1)-O(5)             | 88.07(12)  | Ru(1A)-Ru(1)-O(2A) | 88.98(8)  |
| O(1A)-Ru(1)-N(1)            | 170.66(13) | O(1A)-Ru(1)-O(2A)  | 89.33(13) |
| Ru(1A)-Ru(1)-O(1)           | 50.35(9)   | Ru(1)-O(1)-Ru(1)#1 | 77.51(11) |
| O(1)-Ru(1)-O(1A)            | 102.49(13) | Ru(1A)-O(2)-C(1)   | 119.1(3)  |
| O(1)-Ru(1)-O(2A)            | 89.40(12)  | Ru(1)-O(3)-C(1)    | 119.9(3)  |
| O(3)-Ru(1)-O(5)             | 89.45(12)  | Ru(1)-N(1)-C(2)    | 114.6(3)  |
| O(3)-Ru(1)-N(1)             | 93.34(12)  | Ru(1)-N(1)-C(3)    | 114.4(3)  |
| Ru(1A)-Ru(1)-O(3)           | 88.21(8)   | C(2)-N(1)-C(3)     | 110.3(4)  |
| O(1A)-Ru(1)-O(3)            | 89.84(13)  | C(4)-N(2)-C(5)     | 110.8(4)  |
| O(2A)-Ru(1)-O(3)            | 176.98(11) | C(2)-C(1)-O(4)     | 116.8(4)  |
| O(5)-Ru(1)-N(1)             | 82.70(13)  | O(3)-C(1)-O(4)     | 119.4(4)  |
| Ru(1A)-Ru(1)-O(5)           | 138.40(9)  | O(2)-C(1)-O(3)     | 123.8(4)  |
| O(1A)-Ru(1)-O(5)            | 169.39(13) | N(1)-C(2)-C(4)     | 112.9(4)  |
| O(2A)-Ru(1)-O(5)            | 91.91(12)  | N(1)-C(3)-C(5)     | 112.2(5)  |
| Ru(1A)-Ru(1)-N(1)           | 138.90(10) | N(2)-C(4)-C(2)     | 110.6(4)  |
| O(1A)-Ru(1)-N(1)            | 86.77(13)  | N(2)-C(5)-C(3)     | 110.4(4)  |
| O(2A)-Ru(1)-N(1)            | 89.51(12)  |                    |           |

Symmetry transformations used to generate equivalent atoms: A -x, -y, 2-z

**Table S4.** Selected bond distances (Å) and angles (°) for compound **2**

| Selected bond distances (Å) |            |                    |           |
|-----------------------------|------------|--------------------|-----------|
| Ru(1)-Ru(1A)                | 2.3808(6)  | O(4)-C(1)          | 1.262(7)  |
| Ru(1)-O(1)                  | 1.925(4)   | N(1)-C(2)          | 1.493(7)  |
| Ru(1)-O(2)                  | 2.049(4)   | N(1)-C(3)          | 1.474(8)  |
| Ru(1)-O(5)                  | 2.019(4)   | N(2)-C(4)          | 1.485(9)  |
| Ru(1)-N(1)                  | 2.149(4)   | N(2)-C(5)          | 1.493(9)  |
| Ru(1)-O(1A)                 | 1.874(4)   | C(2)-C(5)          | 1.522(8)  |
| Ru(1)-O(3A)                 | 2.043(4)   | C(3)-C(4)          | 1.530(9)  |
| O(2)-C(1)                   | 1.295(7)   | C(4)-C(6)          | 1.489(13) |
| O(3)-C(1)                   | 1.303(7)   |                    |           |
| Selected angles (°)         |            |                    |           |
| O(1)-Ru(1)-O(2)             | 88.70(16)  | Ru(1A)-Ru(1)-O(1A) | 52.15(12) |
| O(1)-Ru(1)-O(5)             | 87.92(18)  | Ru(1A)-Ru(1)-O(2A) | 89.06(12) |
| O(1A)-Ru(1)-N(1)            | 171.58(19) | O(1A)-Ru(1)-O(2A)  | 89.91(17) |
| Ru(1A)-Ru(1)-O(1)           | 50.24(13)  | Ru(1)-O(1)-Ru(1A)  | 77.62(16) |
| O(1)-Ru(1)-O(1A)            | 102.39(17) | Ru(1)-O(2)-C(1)    | 120.1(4)  |
| O(1)-Ru(1)-O(3A)            | 88.92(16)  | Ru(1A)-O(3)-C(1)   | 119.4(4)  |
| O(3)-Ru(1)-O(5)             | 90.03(18)  | Ru(1)-N(1)-C(2)    | 113.9(3)  |
| O(3)-Ru(1)-N(1)             | 92.76(17)  | Ru(1)-N(1)-C(3)    | 114.3(3)  |
| Ru(1A)-Ru(1)-O(2)           | 88.23(11)  | C(2)-N(1)-C(3)     | 110.1(4)  |
| O(1A)-Ru(1)-O(2)            | 89.08(17)  | C(4)-N(2)-C(5)     | 111.5(5)  |
| O(2)-Ru(1)-O(3A)            | 177.16(16) | O(3)-C(1)-O(4)     | 117.5(5)  |
| O(5)-Ru(1)-N(1)             | 83.79(18)  | O(2)-C(1)-O(4)     | 119.4(5)  |
| Ru(1A)-Ru(1)-O(5)           | 138.15(12) | O(2)-C(1)-O(3)     | 123.1(5)  |
| O(1A)-Ru(1)-O(5)            | 169.63(17) | N(1)-C(2)-C(5)     | 111.3(5)  |
| O(3A)-Ru(1)-O(5)            | 91.43(18)  | N(1)-C(3)-C(4)     | 113.3(5)  |
| Ru(1A)-Ru(1)-N(1)           | 138.06(13) | N(2)-C(4)-C(3)     | 109.7(5)  |
| O(1A)-Ru(1)-N(1)            | 85.94(18)  | N(2)-C(4)-C(6)     | 111.1(7)  |
| O(3A)-Ru(1)-N(1)            | 89.81(17)  | N(2)-C(5)-C(2)     | 109.4(5)  |

Symmetry transformations used to generate equivalent atoms: A -x, 1-y, -z

**Table S5.** Selected bond distances (Å) and angles (°) for compound **3**

| Selected bond distances (Å) |            |           |          |
|-----------------------------|------------|-----------|----------|
| Ru(1)-Ru(1A)                | 2.3898(4)  | O(5)-C(1) | 1.260(3) |
| Ru(1)-O(1)                  | 1.9903(17) | N(1)-C(2) | 1.488(3) |
| Ru(1)-O(2)                  | 1.8883(17) | N(1)-C(3) | 1.487(3) |
| Ru(1)-O(3)                  | 2.0438(17) | N(2)-C(4) | 1.504(3) |
| Ru(1)-N(1)                  | 2.163(2)   | N(2)-C(5) | 1.497(3) |
| Ru(1)-O(2A)                 | 1.9239(17) | C(2)-C(4) | 1.528(3) |
| Ru(1)-O(4A)                 | 2.0406(17) | C(3)-C(5) | 1.518(4) |
| O(3)-C(1)                   | 1.301(3)   | C(4)-C(6) | 1.518(4) |

|                     |           |                   |            |
|---------------------|-----------|-------------------|------------|
| O(4)-C(1)           | 1.302(3)  | C(5)-C(7)         | 1.517(4)   |
| Selected angles (°) |           |                   |            |
| O(1)-Ru(1)-O(2)     | 168.17(7) | O(2A)-Ru(1)-O(4A) | 88.54(7)   |
| O(1)-Ru(1)-O(3)     | 92.98(7)  | Ru(1)-O(2)-Ru(1A) | 77.63(7)   |
| O(1)-Ru(1)-N(1)     | 83.11(8)  | Ru(1)-O(3)-C(1)   | 119.68(14) |
| O(1)-Ru(1)-O(2A)    | 89.21(7)  | Ru(1)-O(4)-C(1)   | 120.00(15) |
| Ru(1A)-Ru(1)-O(1)   | 139.66(5) | Ru(1)-N(1)-C(2)   | 114.82(15) |
| O(1)-Ru(1)-O(4A)    | 88.24(7)  | C(2)-N(1)-C(3)    | 110.24(19) |
| O(2)-Ru(1)-O(3)     | 89.82(7)  | Ru(1)-N(1)-C(3)   | 112.16(15) |
| O(2)-Ru(1)-N(1)     | 85.38(8)  | C(4)-N(2)-C(5)    | 111.61(19) |
| Ru(1A)-Ru(1)-O(2)   | 51.85(5)  | O(3)-C(1)-O(5)    | 118.7(2)   |
| O(2)-Ru(1)-O(2A)    | 102.37(7) | O(3)-C(1)-O(4)    | 123.1(2)   |
| O(2)-Ru(1)-O(4A)    | 89.59(7)  | O(4)-C(1)-O(5)    | 118.3(2)   |
| O(3)-Ru(1)-N(1)     | 90.30(8)  | N(1)-C(2)-C(4)    | 113.18(19) |
| Ru(1A)-Ru(1)-O(3)   | 88.63(5)  | N(1)-C(3)-C(5)    | 113.2(2)   |
| O(2A)-Ru(1)-O(3)    | 88.48(7)  | N(2)-C(4)-C(2)    | 109.52(19) |
| O(3)-Ru(1)-O(4A)    | 176.76(7) | N(2)-C(4)-C(6)    | 108.9(2)   |
| Ru(1A)-Ru(1)-N(1)   | 137.21(6) | C(2)-C(4)-C(6)    | 111.5(2)   |
| O(2A)-Ru(1)-N(1)    | 172.15(8) | C(3)-C(5)-C(7)    | 111.1(2)   |
| O(4A)-Ru(1)-N(1)    | 92.83(8)  | N(2)-C(5)-C(7)    | 109.7(2)   |
| Ru(1A)-Ru(1)-O(2A)  | 50.52(5)  | N(2)-C(5)-C(3)    | 108.90(19) |
| Ru(1A)-Ru(1)-O(4A)  | 88.50(5)  |                   |            |

Symmetry transformations used to generate equivalent atoms: A, 1-x, 1-y, 1-z

**Table S6.** Selected bond distances (Å) and angles (°) for compound **4**

|                             |            |                  |            |
|-----------------------------|------------|------------------|------------|
| Selected bond distances (Å) |            |                  |            |
| Ru(1)-Ru(1A)                | 2.4001(4)  | Mg(1)-O(6)       | 2.1069(19) |
| Ru(1)-O(1A)                 | 2.0185(16) | Mg(1)-O(7)       | 2.085(2)   |
| Ru(1)-O(2)                  | 2.0648(16) | Mg(1)-O(8)       | 2.053(2)   |
| Ru(1)-O(3)                  | 1.9004(16) | Mg(1)-O(9)       | 2.024(2)   |
| Ru(1)-O(5)                  | 2.0568(17) | Mg(1)-O(10)      | 2.052(2)   |
| Ru(1)-O(6)                  | 2.0439(16) | O(1)-C(1)        | 1.311(3)   |
| Ru(1)-O(3A)                 | 1.9060(16) | O(2)-C(1)        | 1.308(3)   |
| Mg(1)-O(5)                  | 2.0839(18) | O(3)-C(1)        | 1.254(3)   |
| Selected angles (°)         |            |                  |            |
| Ru(1A)-Ru(1)-O(2)           | 87.13(5)   | O(5)-Mg(1)-O(6)  | 76.66(7)   |
| Ru(1A)-Ru(1)-O(3)           | 51.01(5)   | O(5)-Mg(1)-O(7)  | 95.12(8)   |
| Ru(1A)-Ru(1)-O(5)           | 139.61(5)  | O(5)-Mg(1)-O(8)  | 172.17(9)  |
| Ru(1A)-Ru(1)-O(6)           | 141.72(5)  | O(5)-Mg(1)-O(9)  | 93.47(8)   |
| Ru(1A)-Ru(1)-O(1A)          | 89.90(5)   | O(5)-Mg(1)-O(10) | 94.45(8)   |
| Ru(1A)-Ru(1)-O(3A)          | 50.81(5)   | O(6)-Mg(1)-O(7)  | 171.43(9)  |
| O(2)-Ru(1)-O(3)             | 87.89(7)   | O(6)-Mg(1)-O(8)  | 95.54(8)   |
| O(2)-Ru(1)-O(5)             | 92.18(7)   | O(6)-Mg(1)-O(9)  | 93.01(8)   |
| O(2)-Ru(1)-O(6)             | 93.13(6)   | O(6)-Mg(1)-O(10) | 91.60(8)   |

|                   |           |                  |            |
|-------------------|-----------|------------------|------------|
| O(1A)-Ru(1)-O(2)  | 177.02(6) | O(7)-Mg(1)-O(8)  | 92.66(9)   |
| O(2)-Ru(1)-O(3A)  | 88.48(6)  | O(7)-Mg(1)-O(9)  | 85.01(9)   |
| O(3)-Ru(1)-O(5)   | 169.38(7) | O(7)-Mg(1)-O(10) | 91.43(9)   |
| O(3)-Ru(1)-O(6)   | 90.72(7)  | O(8)-Mg(1)-O(9)  | 86.29(9)   |
| O(1A)-Ru(1)-O(3)  | 90.14(7)  | O(8)-Mg(1)-O(10) | 86.26(9)   |
| O(3)-Ru(1)-O(3A)  | 101.82(7) | O(9)-Mg(1)-O(10) | 171.59(9)  |
| O(5)-Ru(1)-O(6)   | 78.67(7)  | Ru(1A)-O(1)-C(1) | 120.03(14) |
| O(1A)-Ru(1)-O(5)  | 90.16(7)  | Ru(1)-O(2)-C(1)  | 120.69(13) |
| O(3A)-Ru(1)-O(5)  | 88.80(7)  | Ru(1)-O(5)-Mg(1) | 102.28(8)  |
| O(1A)-Ru(1)-O(6)  | 89.13(6)  | Ru(1)-O(6)-Mg(1) | 101.93(7)  |
| O(3A)-Ru(1)-O(6)  | 167.41(7) | O(1)-C(1)-O(2)   | 122.3(2)   |
| O(1A)-Ru(1)-O(3A) | 89.73(7)  | O(1)-C(1)-O(4)   | 118.3(2)   |
| Ru(1)-O(3)-Ru(1A) | 78.18(6)  | O(2)-C(1)-O(4)   | 119.40(18) |

Symmetry transformations used to generate equivalent atoms: A, 1-x, -y, -z

**Table S7.** Selected bond distances (Å) and angles (°) for compound **5**

| Selected bond distances (Å) |            |                  |            |
|-----------------------------|------------|------------------|------------|
| Ru(1)-Ru(1A)                | 2.3848(4)  | Ni(1)-O(6)       | 2.0598(18) |
| Ru(1)-O(1A)                 | 2.0398(17) | Ni(1)-O(7)       | 2.0574(19) |
| Ru(1)-O(2)                  | 2.0417(17) | Ni(1)-O(8)       | 2.0347(18) |
| Ru(1)-O(3)                  | 1.8879(17) | Ni(1)-O(9)       | 2.0766(18) |
| Ru(1)-O(5)                  | 2.0625(17) | Ni(1)-O(10)      | 2.0860(18) |
| Ru(1)-O(6)                  | 2.0440(17) | O(1)-C(1)        | 1.296(3)   |
| Ru(1)-O(3A)                 | 1.8983(17) | O(2)-C(1)        | 1.304(3)   |
| Ni(1)-O(5)                  | 2.0704(17) | O(4)-C(1)        | 1.247(3)   |
| Selected angles (°)         |            |                  |            |
| Ru(1A)-Ru(1)-O(2)           | 88.23(5)   | O(5)-Ni(1)-O(6)  | 78.37(7)   |
| Ru(1A)-Ru(1)-O(3)           | 51.16(5)   | O(5)-Ni(1)-O(7)  | 96.43(8)   |
| Ru(1A)-Ru(1)-O(5)           | 140.67(5)  | O(5)-Ni(1)-O(8)  | 175.59(7)  |
| Ru(1A)-Ru(1)-O(6)           | 140.36(5)  | O(5)-Ni(1)-O(9)  | 88.13(7)   |
| Ru(1A)-Ru(1)-O(1A)          | 88.62(5)   | O(5)-Ni(1)-O(10) | 94.33(7)   |
| Ru(1A)-Ru(1)-O(3A)          | 50.77(5)   | O(6)-Ni(1)-O(7)  | 174.81(8)  |
| O(2)-Ru(1)-O(3)             | 88.52(7)   | O(6)-Ni(1)-O(8)  | 97.49(7)   |
| O(2)-Ru(1)-O(5)             | 92.64(7)   | O(6)-Ni(1)-O(9)  | 93.79(7)   |
| O(2)-Ru(1)-O(6)             | 87.53(7)   | O(6)-Ni(1)-O(10) | 93.65(7)   |
| O(1A)-Ru(1)-O(2)            | 176.80(7)  | O(7)-Ni(1)-O(8)  | 87.71(8)   |
| O(2)-Ru(1)-O(3A)            | 89.25(7)   | O(7)-Ni(1)-O(9)  | 86.08(7)   |
| O(3)-Ru(1)-O(5)             | 168.12(7)  | O(7)-Ni(1)-O(10) | 86.60(7)   |
| O(3)-Ru(1)-O(6)             | 89.34(7)   | O(8)-Ni(1)-O(9)  | 90.63(8)   |
| O(1A)-Ru(1)-O(3)            | 89.04(7)   | O(8)-Ni(1)-O(10) | 87.44(7)   |
| O(3)-Ru(1)-O(3A)            | 101.92(7)  | O(9)-Ni(1)-O(10) | 172.50(7)  |
| O(5)-Ru(1)-O(6)             | 78.91(7)   | Ru(1A)-O(1)-C(1) | 120.36(16) |
| O(1A)-Ru(1)-O(5)            | 90.17(7)   | Ru(1)-O(2)-C(1)  | 120.52(15) |
| O(3A)-Ru(1)-O(5)            | 89.92(7)   | Ru(1)-O(5)-Ni(1) | 99.68(7)   |

|                   |           |                  |           |
|-------------------|-----------|------------------|-----------|
| O(1A)-Ru(1)-O(6)  | 94.52(7)  | Ru(1)-O(6)-Ni(1) | 100.65(8) |
| O(3A)-Ru(1)-O(6)  | 168.21(7) | O(1)-C(1)-O(2)   | 121.9(2)  |
| O(1A)-Ru(1)-O(3A) | 89.22(7)  | O(1)-C(1)-O(4)   | 118.8(2)  |
| Ru(1)-O(3)-Ru(1A) | 78.08(7)  | O(2)-C(1)-O(4)   | 119.3(2)  |

Symmetry transformations used to generate equivalent atoms: A, 1-x, -y, -z

**Table S8.** Selected bond distances (Å) and angles (°) for compound **6**

| Selected bond distances (Å) |            |                    |            |
|-----------------------------|------------|--------------------|------------|
| Ru(1)-O(1)                  | 2.104(6)   | Ru(1)-Cl(4)        | 2.3451(17) |
| Ru(1)-Cl(1)                 | 2.3661(11) | Ru(1)-Cl(5)        | 2.3283(16) |
| Ru(1)-Cl(2)                 | 2.363(2)   | Ru(1)-Cl(1A)       | 2.3661(11) |
| Selected angles (°)         |            |                    |            |
| Cl(1)-Ru(1)-Cl(2)           | 89.71(3)   | Cl(5)-Ru(1)-O(1)   | 179.67(16) |
| Cl(1)-Ru(1)-Cl(4)           | 90.29(3)   | Cl(1A)-Ru(1)-Cl(2) | 89.71(3)   |
| Cl(1)-Ru(1)-Cl(5)           | 90.78(3)   | Cl(4)-Ru(1)-Cl(5)  | 90.22(6)   |
| Cl(1)-Ru(1)-O(1)            | 89.22(3)   | Cl(4)-Ru(1)-O(1)   | 90.11(16)  |
| Cl(1)-Ru(1)-Cl(1A)          | 178.33(5)  | Cl(1A)-Ru(1)-Cl(4) | 90.29(3)   |
| Cl(2)-Ru(1)-Cl(4)           | 179.81(6)  | Cl(1A)-Ru(1)-Cl(5) | 90.78(3)   |
| Cl(2)-Ru(1)-Cl(5)           | 89.97(6)   | Cl(1A)-Ru(1)-O(1)  | 89.22(3)   |
| Cl(2)-Ru(1)-O(1)            | 89.70(16)  |                    |            |

Symmetry transformations used to generate equivalent atoms: A x, 3/2-y, z.

**Table S9.** Selected bond distances (Å) and angles (°) for compound **7**

| Selected bond distances (Å) |            |                     |            |
|-----------------------------|------------|---------------------|------------|
| Ru(1)-O(1)                  | 1.8209(14) | Ru(1)-Cl(1A)        | 2.3653(15) |
| Ru(1)-Cl(1)                 | 2.3653(15) | Ru(1)-Cl(1B)        | 2.3653(15) |
| Ru(1)-Cl(2)                 | 2.304(5)   | Ru(1)-Cl(1C)        | 2.3653(15) |
| Selected angles (°)         |            |                     |            |
| Cl(1)-Ru(1)-Cl(2)           | 86.94(7)   | Cl(1C)-Ru(1)-Cl(2)  | 86.94(7)   |
| Cl(1)-Ru(1)-O(1)            | 93.06(7)   | Cl(1A)-Ru(1)-O(1)   | 93.06(7)   |
| Cl(1)-Ru(1)-Cl(1A)          | 89.84(5)   | Cl(1B)-Ru(1)-O(1)   | 93.06(7)   |
| Cl(1)-Ru(1)-O(1B)           | 173.88(11) | Cl(1C)-Ru(1)-O(1)   | 93.06(7)   |
| Cl(1)-Ru(1)-Cl(1C)          | 89.84(5)   | Cl(1A)-Ru(1)-Cl(1B) | 89.84(5)   |
| Cl(2)-Ru(1)-O(1)            | 179.98(4)  | Cl(1A)-Ru(1)-Cl(1C) | 173.88(11) |
| Cl(1A)-Ru(1)-Cl(2)          | 86.94(7)   | Cl(1B)-Ru(1)-O(1C)  | 89.84(5)   |
| Cl(1B)-Ru(1)-Cl(2)          | 86.94(7)   | Ru(1)-O(1)-Ru(1D)   | 180.00     |

Symmetry transformations used to generate equivalent atoms: A 1-y, -1+x, z; b 2-x, -y, z; c 1+y, 1-x, z; d x, -y, 1-z.

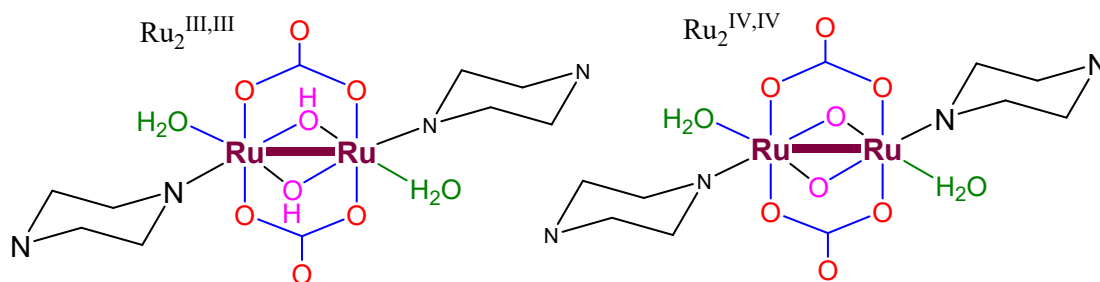

**Table S10** Selected structural parameters of compound **1**. Experiments and DFT-computed values for Models Ru<sub>2</sub><sup>III,III</sup> and Ru<sub>2</sub><sup>IV,IV</sup>

|                   | Exp.       | Ru <sub>2</sub> <sup>III,III</sup> | Ru <sub>2</sub> <sup>IV,IV</sup> |
|-------------------|------------|------------------------------------|----------------------------------|
| Ru(1)-Ru(1A)      | 2.3849(8)  | 2.471                              | 2.400                            |
| Ru(1)-O(1)(b)     | 1.881(3)   | 2.027                              | 1.900                            |
| Ru(1)-O(1A)(b)    | 1.929(3)   | 2.077                              | 1.973                            |
| Ru(1)-O(3)(a)     | 2.050(3)   | 2.101                              | 2.079                            |
| Ru(1)-O(2A)(a)    | 2.037(3)   | 2.115                              | 2.081                            |
| Ru(1)-N(1)(t)     | 2.145(4)   | 2.108                              | 2.133                            |
| Ru(1)-O(8)(t)     | 1.996(3)   | 2.027                              | 2.178                            |
| O(1)-Ru(1)-O(1A)  | 102.49(13) | 105.900                            | 103.442                          |
| N(1)-Ru(1)-O(5)   | 82.70(13)  | 85.725                             | 81.050                           |
| Ru(1)-O(1)-Ru(1A) | 77.51(11)  | 74.044                             | 76.562                           |
| Ru(1)-O(3)-C(1)   | 119.9(3)   | 122.356                            | 120.135                          |
| Ru(1A)-O(2)-C(1)  | 119.1(3)   | 121.097                            | 120.213                          |

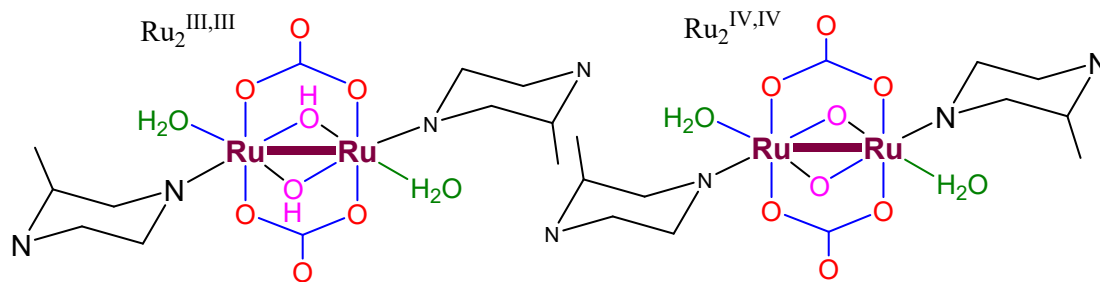

**Table S11** Selected structural parameters of compounds **2**. Experiments and DFT-computed values for Models Ru<sub>2</sub><sup>III,III</sup> and Ru<sub>2</sub><sup>IV,IV</sup>

|                  | Exp.       | Ru <sub>2</sub> <sup>III,III</sup> | Ru <sub>2</sub> <sup>IV,IV</sup> |
|------------------|------------|------------------------------------|----------------------------------|
| Ru(1)-Ru(1A)     | 2.3808(6)  | 2.498                              | 2.401                            |
| Ru(1)-O(1)(b)    | 1.925(4)   | 2.064                              | 1.974                            |
| Ru(1)-O(1A)(b)   | 1.874(4)   | 2.025                              | 1.898                            |
| Ru(1)-O(3A)(a)   | 2.043(4)   | 2.095                              | 2.080                            |
| Ru(1)-O(2)(a)    | 2.049(4)   | 2.105                              | 2.080                            |
| Ru(1)-N(1)(t)    | 2.149(4)   | 2.114                              | 2.132                            |
| Ru(1)-O(5)(t)    | 2.019(4)   | 2.133                              | 2.178                            |
| O(1)-Ru(1)-O(1A) | 102.39(17) | 104.692                            | 103.381                          |
| N(1)-Ru(1)-O(5)  | 83.79(18)  | 82.213                             | 80.919                           |



|                   |           |         |         |
|-------------------|-----------|---------|---------|
| Ru(1)-O(1)-Ru(1A) | 77.62(16) | 75.308  | 76.619  |
| Ru(1)-O(2)-C(13)  | 120.1(4)  | 122.825 | 120.205 |
| Ru(1A)-O(3)-C(13) | 119.4(4)  | 121.994 | 120.160 |

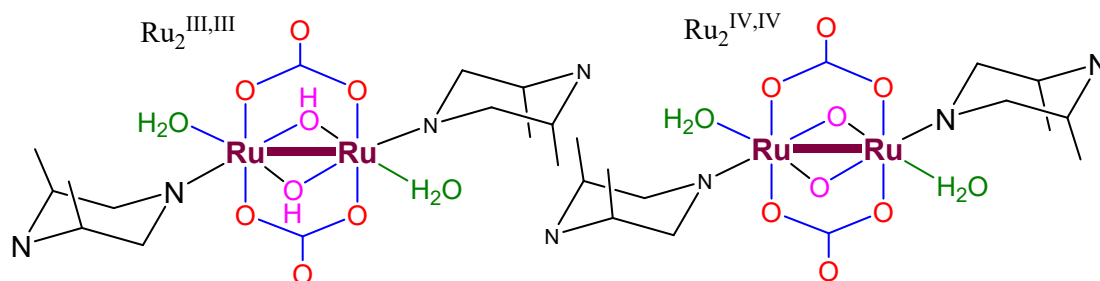

**Table S12** Selected structural parameters of compound **3**. Experiments and DFT-computed values for Models Ru<sub>2</sub><sup>III,III</sup> and Ru<sub>2</sub><sup>IV,IV</sup>

| Atom             | Exp.       | Ru <sub>2</sub> <sup>III,III</sup> | Ru <sub>2</sub> <sup>IV,IV</sup> |
|------------------|------------|------------------------------------|----------------------------------|
| Ru(1)-Ru(1A)     | 2.3898(4)  | 2.469                              | 2.400                            |
| Ru(1)-O(2)(b)    | 1.8883(17) | 2.018                              | 1.898                            |
| Ru(1)-O(2A)(b)   | 1.9239(17) | 2.054                              | 1.974                            |
| Ru(1)-O(3)(a)    | 2.0438(17) | 2.096                              | 2.081                            |
| Ru(2)-O(4A)(a)   | 2.0406(17) | 2.096                              | 2.081                            |
| Ru(1)-N(1)(t)    | 2.163(2)   | 2.129                              | 2.132                            |
| Ru(1)-O(1)(t)    | 1.9903(17) | 2.119                              | 2.179                            |
| O(2)-Ru(1)-O(2A) | 102.37(7)  | 105.349                            | 103.436                          |
| N(1)-Ru(1)-O(1)  | 83.11(8)   | 81.797                             | 81.073                           |
| Ru(1)-O(2)-Ru(2) | 77.63(7)   | 74.651                             | 76.564                           |
| Ru(1)-O(3)-C(1)  | 119.68(14) | 122.225                            | 120.197                          |
| Ru(1A)-O(4)-C(1) | 120.00(15) | 122.042                            | 120.193                          |

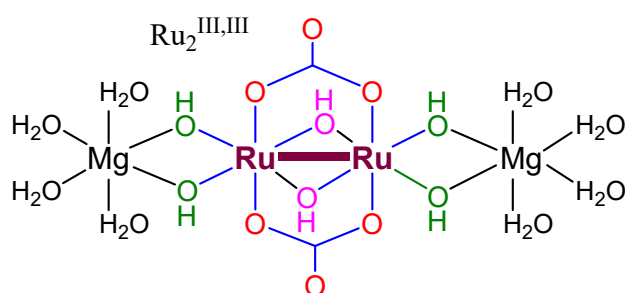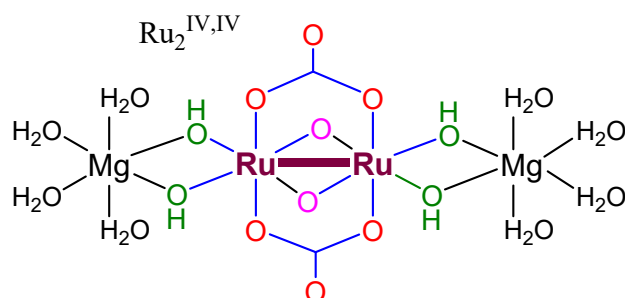

**Table S13** Selected structural parameters of compounds **4**. Experiments and DFT-computed values for Models Ru<sub>2</sub><sup>III,III</sup> and Ru<sub>2</sub><sup>IV,IV</sup>

|                  | Exp.       | Ru <sub>2</sub> <sup>III,III</sup> | Ru <sub>2</sub> <sup>IV,IV</sup> |
|------------------|------------|------------------------------------|----------------------------------|
| Ru(1)-Ru(1A)     | 2.4001(4)  | 2.469                              | 2.406                            |
| Ru(1)-O(3)(b)    | 1.9004(16) | 2.045                              | 1.934                            |
| Ru(1)-O(3A)(b)   | 1.9060(16) | 2.052                              | 1.937                            |
| Ru(1)-O(1A)(a)   | 2.0185(16) | 2.093                              | 2.095                            |
| Ru(2)-O(2)(a)    | 2.0648(16) | 2.0126                             | 2.088                            |
| Ru(1)-O(5)(t)    | 2.0568(17) | 2.071                              | 2.091                            |
| Ru(1)-O(6)(t)    | 2.0439(16) | 2.062                              | 2.087                            |
| Mg(1)-O(5)(t)    | 2.0839(18) | 2.014                              | 2.027                            |
| Mg(1)-O(6)(t)    | 2.1069(19) | 2.019                              | 2.026                            |
| O(3)-Ru(1)-O(3A) | 101.82(7)  | 105.881                            | 103.132                          |
| O(5)-Ru(1)-O(6)  | 78.67(7)   | 85.095                             | 83.159                           |
| Ru(1)-O(3)-Ru(2) | 78.18(6)   | 74.120                             | 76.868                           |
| Ru(1A)-O(1)-C(1) | 120.03(14) | 121.448                            | 121.413                          |
| Ru(1)-O(2)-C(1)  | 120.69(13) | 122.448                            | 121.671                          |

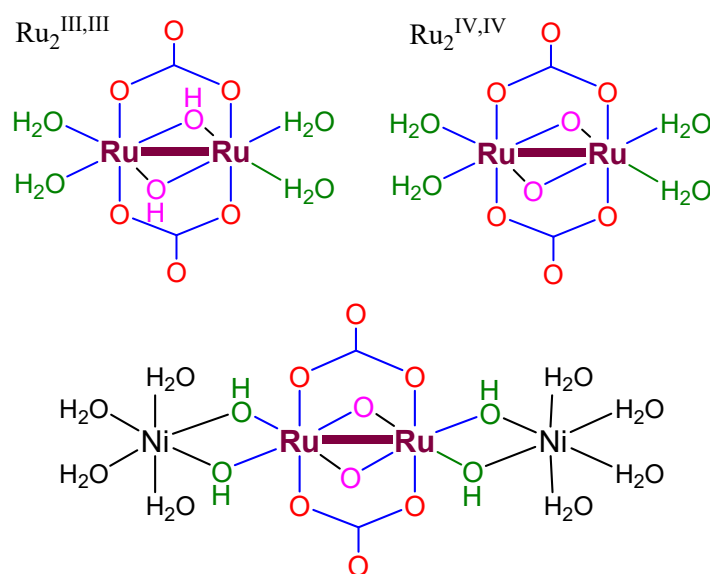

**Table S14** Selected structural parameters of compounds **5**. Experiments and DFT-computed values for Models Ru<sub>2</sub><sup>III,III</sup>, Ru<sub>2</sub><sup>IV,IV</sup> and without omitting.

|                  | Exp.       | Ru <sub>2</sub> <sup>III,III</sup> | Ru <sub>2</sub> <sup>IV,IV</sup> | Without omitting |
|------------------|------------|------------------------------------|----------------------------------|------------------|
| Ru(1)-Ru(1A)     | 2.3848(4)  | 2.456                              | 2.384                            | 2.390            |
| Ru(1)-O(3)(b)    | 1.8879(17) | 2.033                              | 1.924                            | 1.918            |
| Ru(1)-O(3A)(b)   | 1.8983(17) | 2.038                              | 1.923                            | 1.916            |
| Ru(1)-O(1)(a)    | 2.0398(17) | 2.095                              | 2.051                            | 2.079            |
| Ru(2)-O(2)(a)    | 2.0417(17) | 2.098                              | 2.065                            | 2.085            |
| Ru(1)-O(5)(t)    | 2.0625(17) | 2.137                              | 2.187                            | 2.075            |
| Ru(1)-O(6)(t)    | 2.0440(17) | 2.135                              | 2.169                            | 2.072            |
| O(3)-Ru(1)-O(3A) | 101.820    | 105.784                            | 103.503                          | 102.871          |
| O(5)-Ru(1)-O(6)  | 78.660     | 84.370                             | 83.347                           | 82.402           |

|                   |         |         |         |         |
|-------------------|---------|---------|---------|---------|
| Ru(1)-O(3)-Ru(1A) | 78.180  | 74.214  | 76.570  | 77.129  |
| Ru(1)-O(3)-C(1)   | 120.690 | 122.814 | 120.237 | 121.673 |
| Ru(1A)-O(3A)-C(2) | 120.030 | 122.866 | 120.780 | 121.360 |

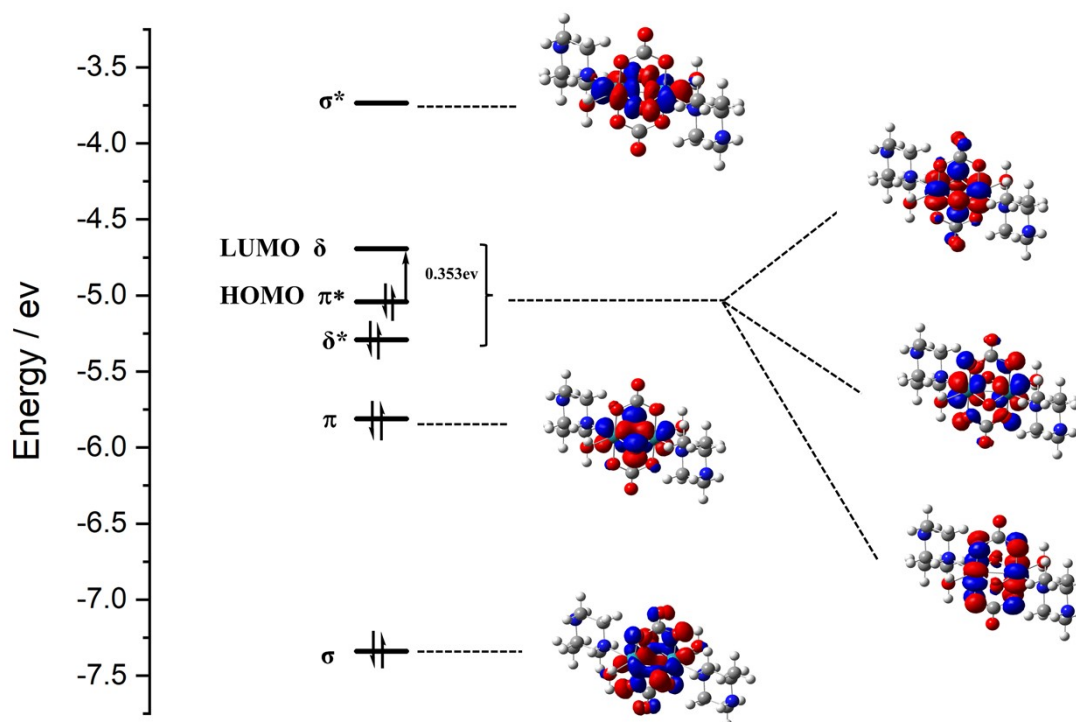

Fig. S23 Molecular orbital diagram of compound **2** with corresponding energies (eV).

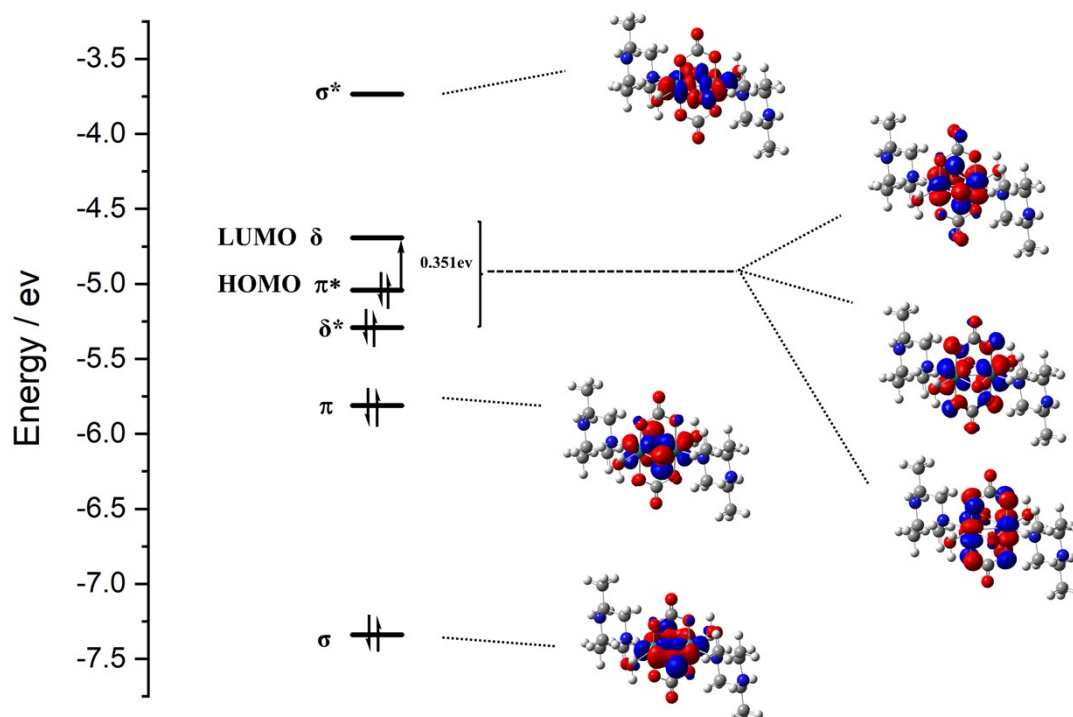

Fig. S26 Molecular orbital diagram of compound **3** with corresponding energies (eV).

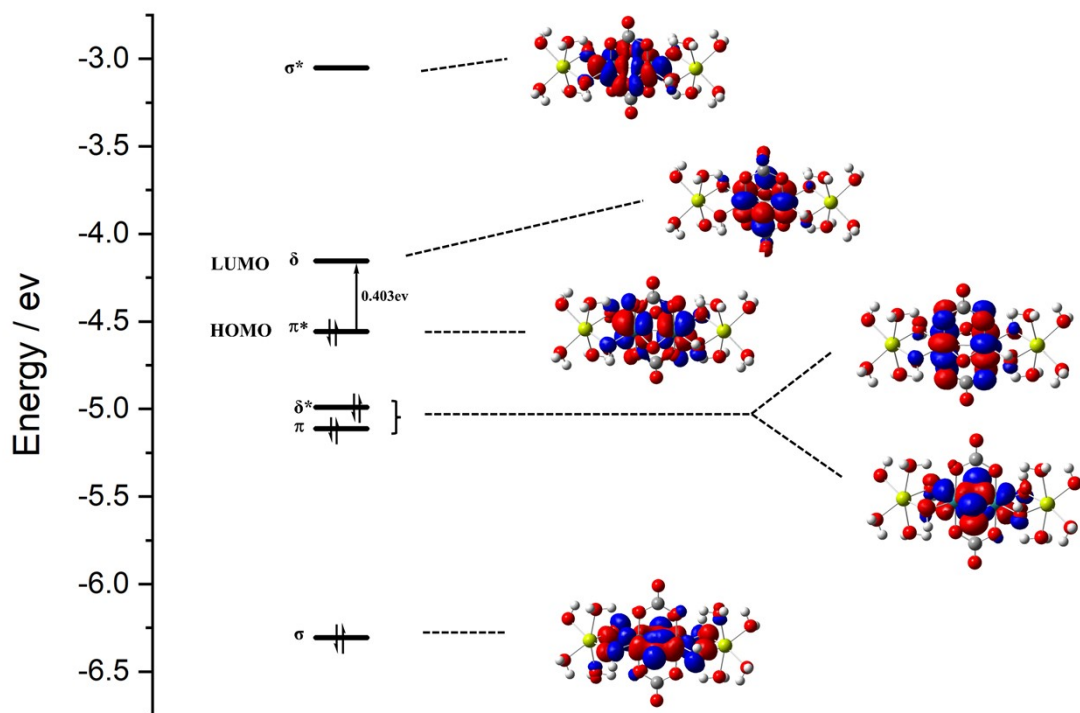

Fig. S27 Molecular orbital diagram of compound **4** with corresponding energies (eV).

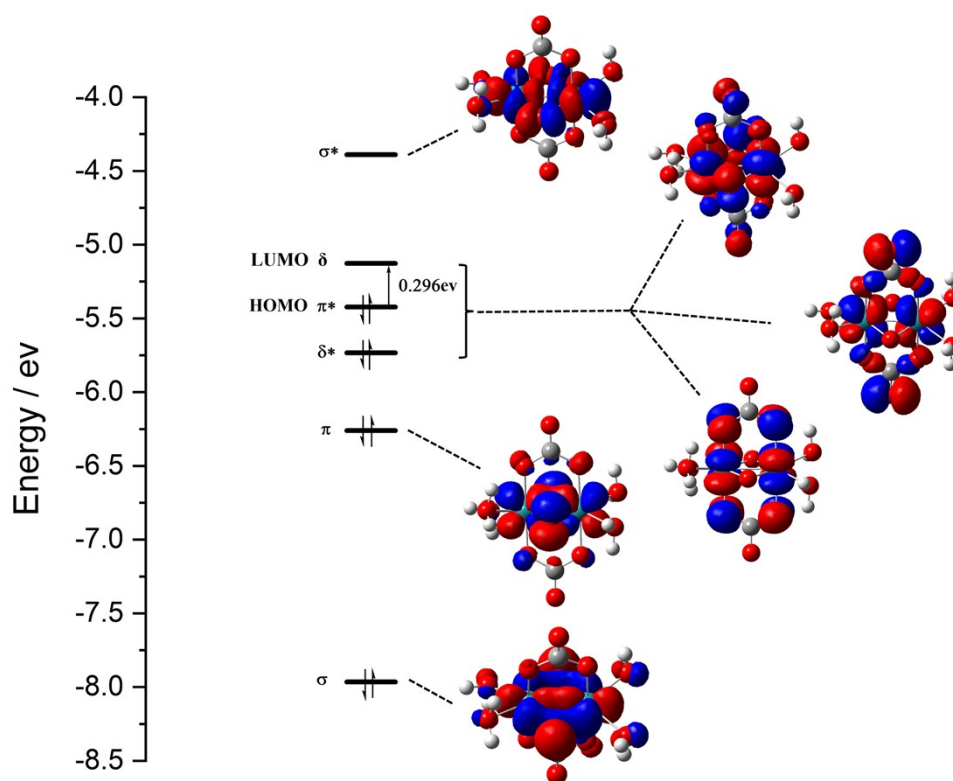

Fig. S28 Molecular orbital diagram of model  $\text{Ru}_2\text{O}_2(\text{CO}_3)_2(\text{H}_2\text{O})_4$  from compound **5** with corresponding energies (eV).

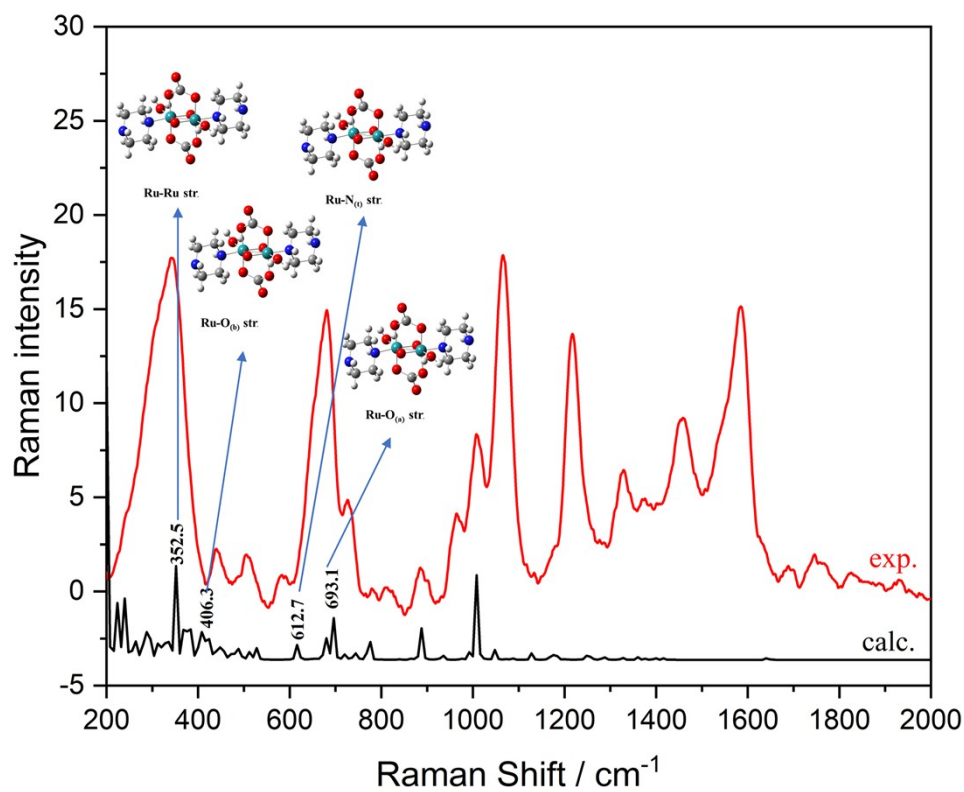

Fig. S29 Experimental and calculated Raman spectra for compound 1.

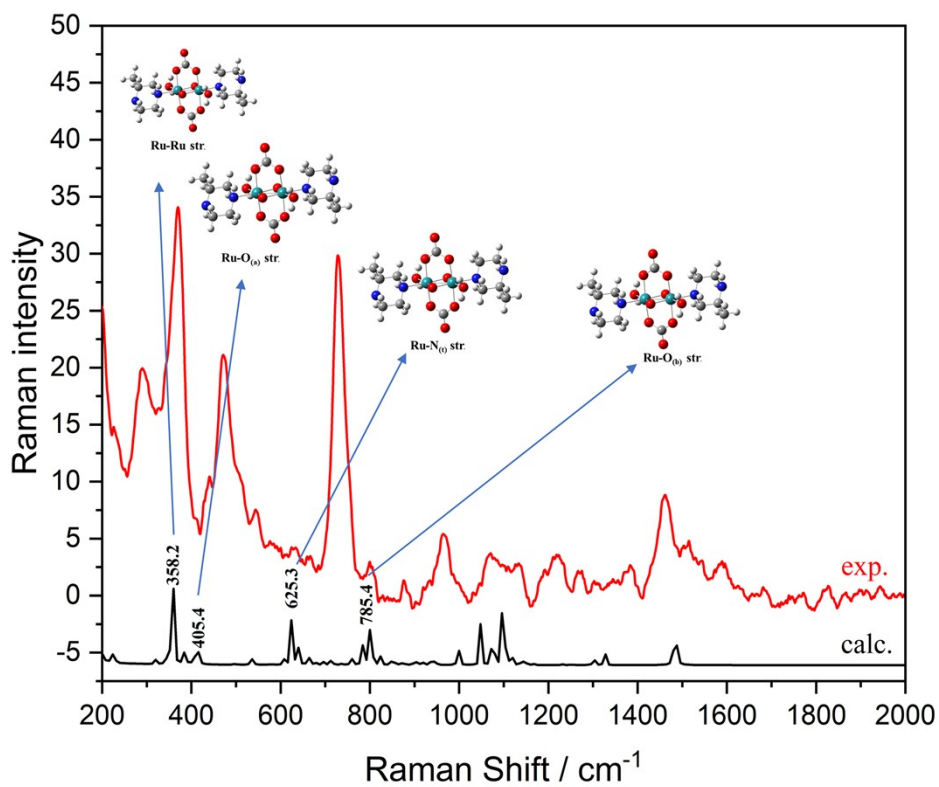

Fig. S30 Experimental and calculated Raman spectra for compound 2.

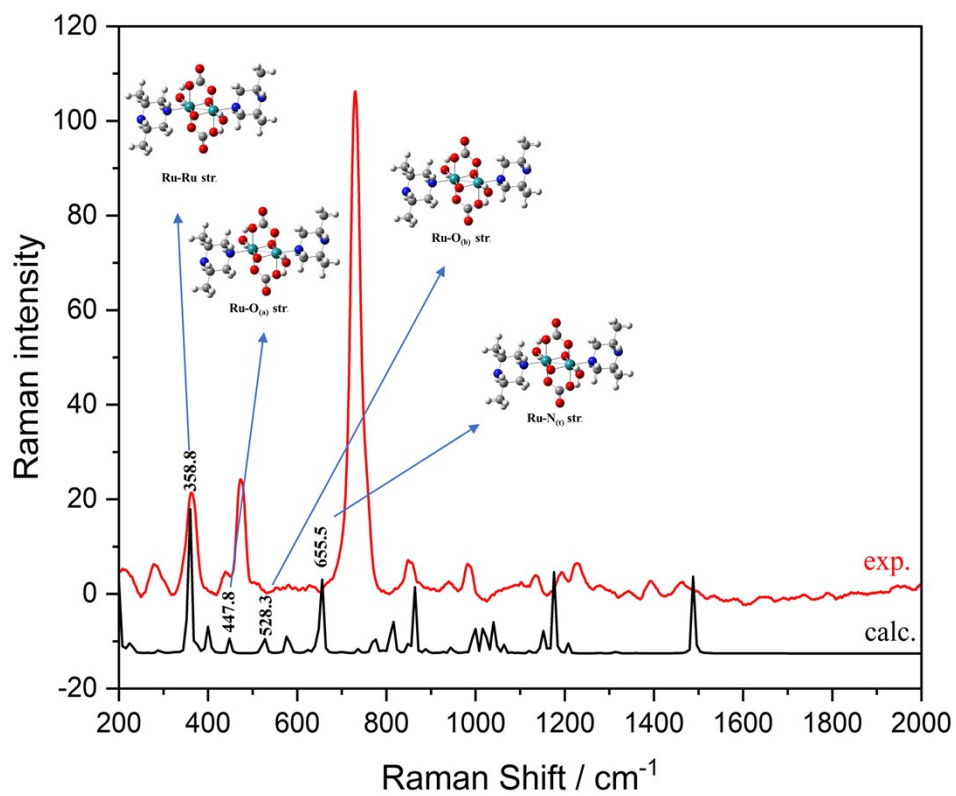

**Fig. S31** Experimental and calculated Raman spectra for compound **3**.
